## Improvement in Oxygenation by Phenylephrine and Nitric Oxide in Patients with Adult Respiratory Distress Syndrome

Elana B. Doering, Ph.D., M.D.,\* C. William Hanson, III, M.D.,† Daniel J. Reily, R.R.T.,‡ Carol Marshall, Ph.D.,† Bryan E. Marshall, M.D.§

**Background:** Inhaled nitric oxide (NO), a selective vasodilator, improves oxygenation in many patients with adult respiratory distress syndrome (ARDS). Vasoconstrictors may also improve oxygenation, possibly by enhancing hypoxic pulmonary vasoconstriction. This study compared the effects of phenylephrine, NO, and their combination in patients with ARDS.

**Methods:** Twelve patients with ARDS ( $\text{Pa}_{\text{O}_2}/\text{Fi}_{\text{O}_2} < 10 < 180$ ; Murray score  $< 2$ ) were studied. Each patient received three treatments in random order: intravenous phenylephrine, 50–200  $\mu\text{g}/\text{min}$ , titrated to a 20% increase in mean arterial blood pressure; inhaled NO, 40 ppm; and the combination (phenylephrine + NO). Hemodynamics and blood gas measurements were made during each treatment and at pre- and posttreatment baselines.

**Results:** All three treatments improved  $\text{Pa}_{\text{O}_2}$  overall. Six patients were "phenylephrine-responders" ( $\Delta\text{Pa}_{\text{O}_2} > 10 \text{ mmHg}$ ), and six were "phenylephrine-nonresponders." In phenyleph-

rine-responders, the effect of phenylephrine was comparable with that of NO ( $\text{Pa}_{\text{O}_2}$  from  $105 \pm 10$  to  $132 \pm 14 \text{ mmHg}$  with phenylephrine, and from  $110 \pm 14$  to  $143 \pm 19 \text{ mmHg}$  with NO), and the effect of phenylephrine + NO was greater than that of either treatment alone ( $\text{Pa}_{\text{O}_2}$  from  $123 \pm 13$  to  $178 \pm 23 \text{ mmHg}$ ). In phenylephrine-nonresponders, phenylephrine did not affect  $\text{Pa}_{\text{O}_2}$ , and the effect of phenylephrine + NO was not statistically different from that of NO alone ( $\text{Pa}_{\text{O}_2}$  from  $82 \pm 12$  to  $138 \pm 28 \text{ mmHg}$  with NO; from  $84 \pm 12$  to  $127 \pm 23 \text{ mmHg}$  with phenylephrine + NO). Data are mean  $\pm$  SEM.

**Conclusions:** Phenylephrine alone can improve  $\text{Pa}_{\text{O}_2}$  in patients with ARDS. In phenylephrine-responsive patients, phenylephrine augments the improvement in  $\text{Pa}_{\text{O}_2}$  seen with inhaled NO. These results may reflect selective enhancement of hypoxic pulmonary vasoconstriction by phenylephrine, which complements selective vasodilation by NO. (Key words: Acute respiratory distress syndrome, hypoxic pulmonary vasoconstriction, Lungs, Murray Score, nitric oxide, phenylephrine, pulmonary circulation, pulmonary hypertension, vasoconstrictors.)

This article is accompanied by an editorial. Please see: Pearl RG: Phenylephrine and inhaled nitric oxide in adult respiratory distress syndrome. ANESTHESIOLOGY 1997;87:1-3

\* Research Fellow (currently Assistant Professor, Department of Anesthesiology, College of Physicians & Surgeons of Columbia University).

† Associate Professor.

‡ Respiratory Therapist.

§ Horatio C. Wood Professor; Director, Center for Research in Anesthesia.

Received from the Center for Research in Anesthesia, Hospital of the University of Pennsylvania, Philadelphia, Pennsylvania. Submitted for publication July 26, 1996. Accepted for publication March 7, 1997. Supported in part by National Institutes of Health-GH 07612. Presented at the 1995 ASA Annual Meeting, October 21–25 (oral presentation), Atlanta, Georgia.

Address reprint requests to Dr. Marshall: Department of Anesthesiology, Hospital of the University of Pennsylvania, 3400 Spruce Street, Philadelphia, Pennsylvania 19104. Address electronic mail to: marshallb@mail.med.upenn.edu

ADULT respiratory distress syndrome (ARDS) is a syndrome with diverse causes, characterized by profound hypoxemia, pulmonary hypertension, and poor lung compliance.<sup>1</sup> Pathologic changes in the lung include alveolar hemorrhage, fluid accumulation, and interstitial-alveolar fibrosis. Pulmonary vascular changes include progressive thickening of arterial wall muscle, thrombosis, narrowing, compression, and occlusion.<sup>2,3</sup> The lung parenchymal and vascular involvement is heterogeneous: there are completely consolidated regions and normally ventilated ones, with similar variation in perfusion. Not surprisingly, intrapulmonary shunt and dead space fractions are high. Hypoxemia in these patients is primarily a result of shunting through consolidated lung.<sup>4</sup>

Inhaled nitric oxide (NO), a locally acting vasodilator, selectively dilates pulmonary vessels in ventilated lung regions. This reduces shunt ( $Q_s/Q_T$ ) and improves arterial oxygenation ( $\text{Pa}_{\text{O}_2}$ ) in patients with ARDS.<sup>5–9</sup> Conversely, nonselective vasodilators tend to increase  $Q_s/Q_T$ .



# PHENYLEPHRINE AND NITRIC OXIDE IN PATIENTS WITH ARDS

$Q_T$  and decrease  $Pa_{O_2}$ , presumably by opposing hypoxic pulmonary vasoconstriction (HPV) in the unventilated lung regions.<sup>5,10</sup>

Almitrine bismesylate, a selective pulmonary arterial vasoconstrictor, decreases  $Q_s/Q_T$  and increases  $Pa_{O_2}$  in patients with ARDS, with a tendency to increase pulmonary artery pressure (PAP). These data suggest that almitrine increases HPV, diverting flow away from the most hypoxic lung regions.<sup>11,12</sup> Studies of almitrine and inhaled NO together suggest that the two drugs have additive effects on  $Pa_{O_2}$ , perhaps because they have complementary mechanisms of redirecting blood flow away from hypoxic lung regions.<sup>13-16</sup>

Theory<sup>17</sup> and preliminary animal studies<sup>18</sup> suggest that even a nonselective vasoconstrictor, given alone, may improve  $Pa_{O_2}$  in the setting of significant shunt. Such an effect would reflect increase of HPV.<sup>17,18</sup> Further, inhaled NO would reverse local vasoconstrictor, such that the combination may reduce shunt, and increase  $Pa_{O_2}$  more than either drug alone.

Phenylephrine, an  $\alpha$ -receptor agonist, has pulmonary and systemic vasoconstrictor effects.<sup>19</sup> Phenylephrine is nonselective (compared with almitrine) and is commonly used in intensive care. We investigated the response to intravenous phenylephrine and to inhaled NO, separately and combined, in a group of patients with ARDS, to determine whether phenylephrine alone would improve  $Pa_{O_2}$  and whether the combination of phenylephrine and inhaled NO would have an additive effect on  $Pa_{O_2}$ .

Based on previous studies with other drugs, we expected substantial variability in response to phenylephrine. It is already known that not all patients with ARDS respond to inhaled NO with increased  $Pa_{O_2}$ , decreased  $Q_s/Q_T$ , or increased PAP.<sup>9,20-25</sup> Similarly, not all patients with ARDS respond to almitrine.<sup>11,12,14,16</sup> We sought to identify patients who responded to phenylephrine and to examine responses relative to patient variables such as baseline physiologic values and severity and duration of disease.

## Materials and Methods

The study was carried out with approval from the Food and Drug Administration (FDA) for experimental drug use (NO) and with approval from the Institutional Human Studies Review Board. Written informed consent was obtained for studies in 12 patients in medical and surgical intensive care units (ICUs). Inclusion crite-

ria were 1) ARDS, defined as  $Pa_{O_2}/Fi_{O_2} < 180$ , infiltrates on chest radiograph, and Murray Score  $< me > 2.0$ ,<sup>1</sup> and 2) presence of arterial and pulmonary artery catheters. Exclusion criteria were 1) age  $< 18$  yr, or 2) hemodynamic instability requiring treatment with any vasopressor or vasodilator medication. Dopamine infusion in renal vasodilator doses ( $< 3 \mu g \cdot kg^{-1} \cdot min^{-1}$ ) was accepted, as long as the infusion continued unchanged throughout the study period.

Each patient received all three treatments in random order: intravenous phenylephrine, 50–200  $\mu g/min$ , infused to achieve a 20% increase in mean arterial blood pressure (mABP); inhaled NO, 40 ppm; or both together (phenylephrine + NO). Twenty minutes of equilibration during each treatment condition preceded each set of measurements. Baseline periods of equal duration preceded and followed each treatment period, with 20-min equilibration periods before measurements.  $Fi_{O_2}$  was 0.90 for the entire study. Only one baseline period occurred between treatments; for example, if phenylephrine followed NO treatments, the “postphenylephrine” baseline was also the “pre-NO” baseline, and so on.

Phenylephrine was administered in saline (200  $\mu g/ml$ ), *via* a standard intravenous infusion pump. NO was delivered from a tank containing 800 ppm NO (BOC Gases, Port Allen, Louisiana). Stock NO was diluted with medical grade nitrogen ( $N_2$ , Puritan-Bennett, Boston, MA) using an air-oxygen blender (Ohmeda, Austell, GA); the gas mixture was delivered to the high-pressure air inlet of an ICU ventilator (Puritan-Bennett 7200, Puritan Bennett, Boston, MA), as described elsewhere.<sup>26</sup> Waste gas was directed to a scavenging container (Boehringer, Laboratories, Wynnwood, PA) and from there evacuated to the hospital's waste gas system. NO and  $NO_2$  concentrations were continuously monitored from the inspiratory limb of the ventilator, using an aspirating dual-channel chemiluminescence analyzer (Eco Physics CLD 700AL, Eco Physics, Ann Arbor, MI).  $NO_2$  concentrations never reached 5 ppm (OSHA limit<sup>27</sup>).

Measurements were made using standard ICU monitors: electrocardiogram, arterial cannula, pulmonary artery catheter with thermodilution cardiac output capability, and central venous catheter. Pressure transducers were connected to a Hewlett Packard ICU monitor (Hewlett Packard, San Diego, CA). Values for heart rate (HR), blood pressures (BP), pulmonary artery pressures (PAP), and central venous pressures (CVP) were simultaneously recorded every minute automatically; five consecutive measurements were averaged to obtain values for each period. At the same time, respiratory rate,



peak pressures, and PEEP were recorded from the ventilator's spirometer. Four consecutive measurements were averaged to obtain values of each of these quantities. Minute ventilation ( $V_E$ ) was counted over 1 min. Expired gas passed through a baffled 5-l chamber, which ensured complete mixing ( $P_{CO_2}$  independent of respiratory cycle) with equilibration well within each 20-min stabilization period.<sup>28</sup> Mixed expired carbon dioxide ( $PE_{CO_2}$ ) was measured by an aspirating capnograph (Ohmeda 5200) at the outlet of the chamber.

After hemodynamic and ventilatory measurements were complete (5 min), one arterial and one mixed venous blood sample were drawn to obtain  $P_{O_2}$ ,  $P_{CO_2}$ , pH,  $O_2$  saturation ( $S_{O_2}$ ), hemoglobin (Hb), and methemoglobin (metHb). The two Hb determinations were averaged to obtain Hb. Four thermodilution cardiac output (CO) determinations were then performed at random throughout the respiratory cycle. These values were averaged. Finally, pulmonary artery occlusion pressure (PAOP) was determined once at end-expiration, concluding the measurements for each period.

Systemic and pulmonary vascular resistances and oxygen consumption ( $V_{O_2}$ ) were calculated using standard equations. Carbon dioxide production ( $V_{CO_2}$ ) was determined as  $V_E \times FE_{CO_2}$ , and the resulting value was used to determine respiratory quotient,  $R$  ( $R \equiv V_{CO_2}/V_{O_2}$ ).  $R$  was used to calculate  $Pa_{O_2}$  and hence  $Q_s/Q_T$ , using standard equations. Of note, the contribution of  $R$  to  $Q_s/Q_T$  is small at high  $Fi_{O_2}$ , so that substituting  $R = 0.8$  for "measured"  $R$  did not change calculated  $Q_s/Q_T$  by more than 1%.

Physiologic data for the various baselines and treatments were compared using analysis of variance (ANOVA) for repeated measures, with pairwise comparisons by the Newman-Keuls method. Other between-subgroup comparisons were performed using unpaired  $t$  tests (for parametric data, such as initial baseline values), Wilcoxon rank-sum test (for nonparametric data, namely, Murray scores), and Fisher's exact test (for binomial data, namely, survival).<sup>29</sup> In all analyses, a  $P$  value less than 0.05 was accepted as statistically significant.

## Results

### Patients

Twelve patients were enrolled. As shown in table 1, causes and severity of ARDS were variable, with Murray scores ranging from 2.00 to 3.75 (median, 3.00). Duration of ARDS at time of study ranged from 1 to 13

days. All patients had arterial hypoxemia, pulmonary hypertension, and elevated shunt fractions ( $Q_s/Q_T$ ).

### Effects of Treatments

Baseline data for  $Pa_{O_2}$ , mPAP, and  $Q_s/Q_T$  were grouped by period (first, second, third, or fourth baseline) and then by treatment (prephenylephrine, pre-NO, or prephenylephrine + NO baseline). Grouping baseline values by treatment required dropping the fourth baseline because it did not precede a treatment. Baseline values varied significantly by patient (two-factor ANOVA for repeated measures;  $P < 0.0001$ ). However, baseline values (shown in table 2) did not vary significantly by period or by treatment (two-factor ANOVA for repeated measures).

Nitric oxide alone increased  $Pa_{O_2}$  by  $> 10$  mmHg in 11 of the 12 patients, we called these patients "NO-responders," using a definition proposed by other investigators.<sup>9,14</sup> Phenylephrine alone increased  $Pa_{O_2}$  by  $> 10$  mmHg in six patients, which we called "phenylephrine-responders." With six in each group, we were able to compare phenylephrine-responders with phenylephrine-nonresponders, as will be described.

All three treatments—phenylephrine, NO, and phenylephrine + NO—improved  $Pa_{O_2}$  when data from all patients were analyzed together. Figure 1 shows each patient's pretreatment, treatment, and posttreatment values of  $Pa_{O_2}$ . These were analyzed by two-factor ANOVA for repeated measures, with treatment values of  $Pa_{O_2}$  compared with each other and to pre- and posttreatment baselines, using the Newman-Keuls method of pairwise comparisons.<sup>29</sup> Average  $Pa_{O_2}$  values with all treatments were significantly ( $P < 0.05$ ) higher than baseline values.  $Pa_{O_2}$  values with phenylephrine + NO were not statistically different from those with NO alone in the total patient group; both were significantly higher than  $Pa_{O_2}$  values in the group receiving phenylephrine alone. Table 2 shows average baseline and treatment values of  $Pa_{O_2}$ .

When the patients were subdivided into phenylephrine-responders and phenylephrine-nonresponders, additional trends emerged. Figure 2 shows average pretreatment, treatment, and posttreatment values of  $Pa_{O_2}$  for the two subgroups; numerical data are given in table 3. Data and calculated values were analyzed by ANOVA as described in the previous paragraph.

Within the phenylephrine-responders subgroup,  $Pa_{O_2}$  increased significantly ( $P < 0.05$ ) with every treatment.  $Pa_{O_2}$  values with phenylephrine alone were not statistically different from those with NO alone.  $Pa_{O_2}$  values



## PHENYLEPHRINE AND NITRIC OXIDE IN PATIENTS WITH ARDS

Table 1. Clinical Characteristics of Study Patients

| Patient No. | Age (yr) | Murray Score | Duration of ARDS | Survival | History                   |
|-------------|----------|--------------|------------------|----------|---------------------------|
| 1*          | 44       | 2.50         | 3                | No       | MVA, splenectomy          |
| 2           | 77       | 3.00         | 7                | No       | Variceal bleed            |
| 3*          | 42       | 3.25         | 5                | No       | Hepatic lobectomy         |
| 4           | 67       | 3.00         | 9                | Yes      | Acute respiratory disease |
| 5*          | 58       | 2.00         | 2                | Yes      | Wegener's granulomatosis  |
| 6*          | 36       | 3.00         | 1                | No       | Aortic dissection         |
| 7           | 35       | 3.25         | 5                | No       | Liver transplant          |
| 8*          | 39       | 3.75         | 13               | Yes      | Perforated bowel          |
| 9           | 20       | 3.00         | 1                | No       | MVA, splenectomy          |
| 10          | 35       | 3.75         | 11               | No       | Abruptio placentae        |
| 11          | 41       | 3.50         | 3                | No       | PE, pulmonary hemorrhage  |
| 12*         | 49       | 2.50         | 3                | Yes      | Motorcycle accident       |

ARDS = adult respiratory distress syndrome; MVA = motor vehicle accident; PE = pulmonary embolism.

\* Phenylephrine responders.

with phenylephrine + NO were significantly higher than  $Pa_{O_2}$  values with either phenylephrine or NO alone. Within the phenylephrine-nonresponders subgroup,  $Pa_{O_2}$  did not increase significantly with phenylephrine (as per the definition of the subgroup), although  $Pa_{O_2}$  did increase significantly ( $P < 0.05$ ) with NO and with phenylephrine + NO. The  $Pa_{O_2}$  values with phenylephrine + NO were not statistically different from those receiving NO alone.

Mean systemic arterial BP increased significantly ( $P < 0.05$ ) with phenylephrine in every patient by design, as phenylephrine was titrated to a 20% increase in mABP. Within the phenylephrine-responder subgroup (as defined previously), mean pulmonary artery pressure (mPAP) increased significantly with phenylephrine. Within the phenylephrine-nonresponder subgroup, mPAP decreased significantly with NO. CO, HR, and PAOP did not change significantly with any treatment in the total patient group or within either subgroup. However, the power of this study to detect clinically significant changes in these hemodynamic quantities was low ( $< 50\%$ ) because of the small size of the sample. Table 2 and Table 3 give values of mPAP, mABP, HR, CO, and PAOP.

$Q_s/Q_T$  decreased with NO and with phenylephrine + NO in the total patient group and within the phenylephrine-nonresponder subgroup. Within the phenylephrine-responder subgroup,  $Q_s/Q_T$  did not change significantly with any treatment. PVR and  $V_D/V_T$  did not change significantly with any treatment in the total patient group or within either subgroup. However, as with the hemodynamic quantities discussed previously, the power of this study to detect clinically significant changes in  $Q_s/Q_T$ , PVR, or  $V_D/V_T$  was very low (about

70% for  $Q_s/Q_T$ ;  $< 30\%$  for the others). Table 2 and Table 3 give values of  $Q_s/Q_T$ , PVR, and  $V_D/V_T$ .

#### Phenylephrine-responders versus Phenylephrine-nonresponders

Phenylephrine-responders required less phenylephrine ( $P < 0.05$  by unpaired  $t$  test) to achieve the 20% systemic blood pressure increase than did the phenylephrine-nonresponders. The dose (infusion rate) of phenylephrine averaged  $75 \pm 11 \mu\text{g}/\text{min}$  in phenylephrine-responders and  $169 \pm 29 \mu\text{g}/\text{min}$  in phenylephrine-nonresponders. Data are mean  $\pm$  SE.

Initial (first) baseline values of measured and calculated quantities did not differ significantly (by unpaired  $t$  test) between the two subgroups; however, the study had limited power to detect differences, as noted previously. The subgroups did respond differently to treatment as described.

Phenylephrine-responders did not differ significantly from phenylephrine-nonresponders in average age, duration of ARDS at time of study, Murray scores, or survival (discharged *vs.* passed away in hospital). Ages and ARDS duration were compared by  $t$  test; Murray scores were compared by Wilcoxon rank-sum test, and survival data were compared using Fisher's exact test. Mean age was the same in the two subgroups. Median values of ARDS duration, Murray score, and mortality were higher in phenylephrine-nonresponders, but the differences between groups were not statistically significant. As noted with regard to other variables, the small size of the groups limited the power of the study to detect differences in these characteristics.



Table 2. Raw Data: Total Patient Group

|                                | Pre-NO      | NO           | Post-NO     | Prephenylephrine | Phenylephrine | Postphenylephrine | Pre-both    | Phenylephrine + NO | Post-both   |
|--------------------------------|-------------|--------------|-------------|------------------|---------------|-------------------|-------------|--------------------|-------------|
| PaO <sub>2</sub> (mmHg)        | 96 ± 10     | 141 ± 16*    | 103 ± 12    | 94 ± 8           | 109 ± 12*     | 94 ± 9            | 104 ± 11    | 152 ± 17*          | 96 ± 11     |
| PvO <sub>2</sub> (mmHg)        | 39 ± 2      | 39 ± 1       | 38 ± 2      | 38 ± 2           | 40 ± 1        | 40 ± 1            | 38 ± 2      | 40 ± 1             | 37 ± 1      |
| PaCO <sub>2</sub> (mmHg)       | 44 ± 1      | 44 ± 2       | 46 ± 2      | 45 ± 2           | 47 ± 2        | 47 ± 2            | 45 ± 2      | 45 ± 2             | 43 ± 2      |
| mABP (mmHg)                    | 81 ± 4      | 79 ± 4       | 79 ± 4      | 78 ± 3           | 95 ± 3*       | 78 ± 3            | 79 ± 3      | 97 ± 4             | 80 ± 4      |
| mPAP (mmHg)                    | 34 ± 4      | 31 ± 3       | 34 ± 4      | 34 ± 4           | 37 ± 5        | 31 ± 2            | 34 ± 4      | 35 ± 4             | 34 ± 4      |
| HR (bpm)                       | 100 ± 6     | 99 ± 6       | 98 ± 6      | 101 ± 6          | 95 ± 6        | 100 ± 7           | 100 ± 6     | 93 ± 6             | 98 ± 6      |
| CO (L/min)                     | 8.0 ± 0.9   | 8.5 ± 1.0    | 8.2 ± 1.1   | 8.7 ± 1.1        | 8.6 ± 1.2     | 8.4 ± 0.9         | 8.5 ± 1.0   | 8.7 ± 1.1          | 8.7 ± 1.1   |
| PAOP (mmHg)                    | 15 ± 1      | 13 ± 1       | 15 ± 1      | 15 ± 1           | 17 ± 1        | 13 ± 1            | 14 ± 1      | 16 ± 1             | 15 ± 1      |
| Q <sub>s</sub> /Q <sub>t</sub> | 0.40 ± 0.02 | 0.31 ± 0.02* | 0.38 ± 0.02 | 0.38 ± 0.01      | 0.37 ± 0.02   | 0.40 ± 0.02       | 0.38 ± 0.02 | 0.34 ± 0.02*       | 0.39 ± 0.02 |
| PVR (mmHg)                     | 246 ± 77    | 202 ± 48     | 239 ± 77    | 245 ± 76         | 281 ± 91      | 188 ± 31          | 229 ± 66    | 223 ± 53           | 250 ± 78    |
| V <sub>o</sub> /V <sub>t</sub> | 0.63 ± 0.02 | 0.63 ± 0.03  | 0.64 ± 0.03 | 0.61 ± 0.03      | 0.61 ± 0.03   | 0.62 ± 0.03       | 0.61 ± 0.03 | 0.61 ± 0.03        | 0.62 ± 0.03 |

Data are mean ± SEM.

\* Significantly different from baseline values ( $P < 0.05$ ).

## Discussion

In a group of patients with ARDS treated with phenylephrine infusion, some responded with increases in PaO<sub>2</sub> of 10 mmHg or more comparable with the increases in PaO<sub>2</sub> achieved by inhalation of NO. These patients were identified as "phenylephrine-responders" after a definition in the NO literature.<sup>9,14</sup> (Other investigators have defined response using a ratio, requiring an increase in PaO<sub>2</sub> to 110% of baseline;<sup>23</sup> in our patient group, this yields the same subgroups as the definition used herein.) The PaO<sub>2</sub> response to phenylephrine suggests that, in certain patients, phenylephrine acts to increase HPV.

In the phenylephrine-responsive subgroup, the combination of phenylephrine + NO increased PaO<sub>2</sub> significantly more than did either treatment alone. The changes in PaO<sub>2</sub> were large, such that the study had 80–90% statistical power to detect differences of such magnitudes despite the small size of the subgroups. The result supports the hypothesis that the two agents act by complementary mechanisms to improve PaO<sub>2</sub>. According to the hypothesis, phenylephrine would increase HPV, thereby primarily affecting poorly ventilated and shunt regions, whereas NO causes pulmonary vasodilation, primarily affecting better-ventilated regions. Phenylephrine may increase HPV by a nonspecific effect of pulmonary vasoconstriction, as similar improvements in PaO<sub>2</sub> have been observed with other pulmonary vasoconstrictors.<sup>11–18</sup>

Phenylephrine increased mPAP significantly in phenylephrine-responders but not in phenylephrine-nonresponders, suggesting that regional pulmonary vasoconstriction may be necessary and sufficient to improve oxygenation. Calculated PVR values did not change significantly with treatments in any groups, but the statistical power to detect changes was low. Another possibility is that systemic vasoconstriction by phenylephrine leads to reduced CO and thus to reduced absolute and relative shunt flow. Lower CO may lead to decreased SvO<sub>2</sub>, which increases the stimulus for HPV. CO did not change significantly with treatments in any groups, but the power to detect changes was low, so we cannot rule out CO as a determinant of PaO<sub>2</sub> changes.

Our results provide a potential explanation of the difference between phenylephrine-responsive and phenylephrine-nonresponsive patients with ARDS. As noted previously, phenylephrine-responders manifested an increase in mPAP with phenylephrine, suggesting that the pulmonary vasculature is more able to constrict than in



## PHENYLEPHRINE AND NITRIC OXIDE IN PATIENTS WITH ARDS

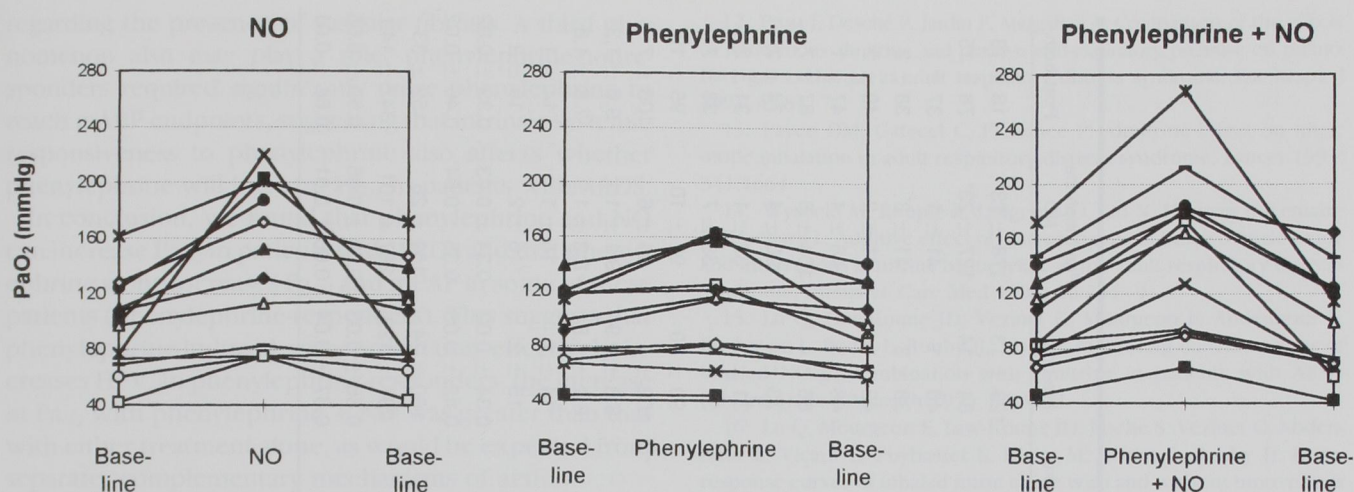

Fig. 1.  $\text{PaO}_2$  data for individual patients. Twelve patients with ARDS received each of three treatments: nitric oxide (NO) inhaled at 40 ppm, phenylephrine infused to achieve a 20% increase in mean arterial blood pressure, or both (phenylephrine + NO). Baseline values were recorded before and after each treatment, allowing 20 min to achieve steady state.  $\text{PaO}_2$  values are shown for each patient, for each treatment, and for the baselines before and after treatment.  $\text{FiO}_2$  for all data points was 0.9.

phenylephrine-nonresponders. Two pathologic features of ARDS could limit phenylephrine-induced pulmonary vasoconstriction: 1) extensive consolidation, *i.e.*, preexisting maximal constriction (caused by HPV), or 2) vascular fibrosis, which limits the vessels' intrinsic ability to

constrict. Average mPAP declined with NO in phenylephrine-nonresponders, suggesting that they had more reversible pulmonary vasoconstriction than phenylephrine-responders, which is consistent with maximal constriction resulting from hypoxia. We can only speculate

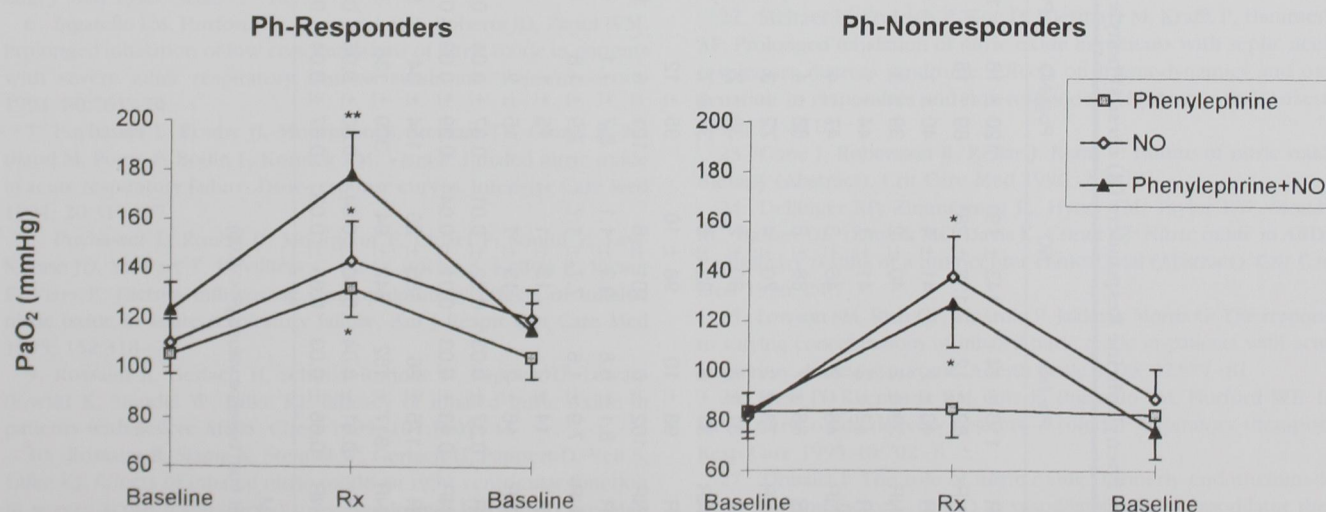

Fig. 2.  $\text{PaO}_2$  values, phenylephrine-responders versus phenylephrine-nonresponders. Patients were identified as phenylephrine-responders if  $\text{PaO}_2$  increased by 10 mmHg or more (on  $\text{FiO}_2$  0.9) when phenylephrine was infused as described (see figure 1). Six patients were phenylephrine-responders, and six were phenylephrine-nonresponders. Average  $\text{PaO}_2$  values are shown for each group, for each treatment, and for the baselines before and after each treatment. Bars show standard errors. Asterisk (\*) identifies a significant ( $P < 0.05$ ) change from both baselines. The double asterisk (\*\*) for phenylephrine-responders receiving phenylephrine + NO indicates that the increase in  $\text{PaO}_2$  with combined treatment was significantly ( $P < 0.05$ ) greater than the increase in  $\text{PaO}_2$  with either treatment alone.

Table 3. Raw Data: Phenylephrine Responders (R) versus Phenylephrine Nonresponders (NR)

|                                |    | Pre-NO      | NO           | Post-NO     | Prephenylephrine | Phenylephrine | Postphenylephrine | Pre-both    | Phenylephrine + NO | Post-both   |
|--------------------------------|----|-------------|--------------|-------------|------------------|---------------|-------------------|-------------|--------------------|-------------|
| PaO <sub>2</sub> (mmHg)        | R  | 110 ± 14    | 143 ± 19*    | 120 ± 18    | 105 ± 10         | 132 ± 14*     | 104 ± 13          | 123 ± 13    | 178 ± 23*          | 116 ± 13    |
|                                | NR | 82 ± 12     | 138 ± 28*    | 89 ± 15     | 84 ± 12          | 85 ± 13       | 123 ± 13          | 84 ± 14     | 127 ± 23*          | 76 ± 15     |
| PvO <sub>2</sub> (mmHg)        | R  | 40 ± 2      | 41 ± 1       | 40 ± 1      | 40 ± 1           | 41 ± 1        | 42 ± 1            | 40 ± 1      | 41 ± 1             | 37 ± 1      |
|                                | NR | 39 ± 2      | 40 ± 2       | 39 ± 3      | 39 ± 3           | 39 ± 2        | 38 ± 2            | 38 ± 3      | 41 ± 3             | 38 ± 2      |
| PaCO <sub>2</sub> (mmHg)       | R  | 42 ± 2      | 41 ± 1       | 44 ± 1      | 43 ± 1           | 44 ± 1        | 43 ± 1            | 42 ± 1      | 41 ± 2             | 40 ± 2      |
|                                | NR | 46 ± 2      | 46 ± 3       | 47 ± 4      | 47 ± 3           | 50 ± 3        | 50 ± 3            | 48 ± 3      | 48 ± 4             | 47 ± 1      |
| mABP (mmHg)                    | R  | 88 ± 7      | 88 ± 6       | 88 ± 4      | 83 ± 4           | 100 ± 5*      | 84 ± 4            | 86 ± 4      | 104 ± 6            | 87 ± 7      |
|                                | NR | 73 ± 2      | 70 ± 4       | 72 ± 3      | 74 ± 3           | 90 ± 3*       | 71 ± 3            | 73 ± 4      | 90 ± 4             | 74 ± 2      |
| mPAP (mmHg)                    | R  | 31 ± 2      | 30 ± 2       | 30 ± 2      | 30 ± 2           | 32 ± 2*       | 30 ± 2            | 31 ± 2      | 32 ± 1             | 31 ± 2      |
|                                | NR | 37 ± 8      | 32 ± 6*      | 37 ± 7      | 38 ± 9           | 42 ± 10       | 31 ± 5            | 37 ± 8      | 38 ± 7             | 38 ± 7      |
| HR (bpm)                       | R  | 98 ± 10     | 98 ± 10      | 95 ± 12     | 97 ± 10          | 91 ± 10       | 97 ± 10           | 99 ± 10     | 92 ± 10            | 95 ± 10     |
|                                | NR | 102 ± 6     | 101 ± 6      | 101 ± 6     | 104 ± 7          | 99 ± 7        | 104 ± 9           | 102 ± 7     | 94 ± 6             | 100 ± 7     |
| CO (L/min)                     | R  | 8.1 ± 0.8   | 9.3 ± 1.1    | 8.7 ± 1.1   | 9.3 ± 1.1        | 8.9 ± 1.3     | 8.4 ± 0.8         | 8.8 ± 0.9   | 9.1 ± 1.1          | 9.6 ± 1.3   |
|                                | NR | 7.9 ± 1.6   | 7.7 ± 1.7    | 7.9 ± 1.8   | 8.2 ± 2.0        | 8.2 ± 2.1     | 8.4 ± 1.8         | 8.1 ± 1.8   | 8.3 ± 1.9          | 7.8 ± 1.8   |
| PAOP (mmHg)                    | R  | 14 ± 2      | 13 ± 1       | 15 ± 1      | 13 ± 1           | 16 ± 2        | 13 ± 1            | 14 ± 1      | 15 ± 1             | 14 ± 1      |
|                                | NR | 16 ± 2      | 13 ± 1       | 15 ± 2      | 16 ± 1           | 17 ± 2        | 13 ± 2            | 15 ± 2      | 16 ± 2             | 15 ± 2      |
| Q <sub>s</sub> /Q <sub>t</sub> | R  | 0.37 ± 0.03 | 0.32 ± 0.01  | 0.37 ± 0.04 | 0.35 ± 0.01      | 0.35 ± 0.02   | 0.36 ± 0.03       | 0.34 ± 0.02 | 0.34 ± 0.03        | 0.33 ± 0.02 |
|                                | NR | 0.43 ± 0.03 | 0.31 ± 0.04* | 0.39 ± 0.03 | 0.40 ± 0.02      | 0.40 ± 0.03   | 0.44 ± 0.02       | 0.42 ± 0.03 | 0.35 ± 0.04*       | 0.46 ± 0.02 |
| PVR (mmHg)                     | R  | 175 ± 26    | 155 ± 26     | 154 ± 34    | 159 ± 32         | 169 ± 41      | 171 ± 25          | 160 ± 24    | 159 ± 26           | 152 ± 33    |
|                                | NR | 317 ± 152   | 249 ± 94     | 309 ± 136   | 349 ± 160        | 415 ± 186     | 207 ± 64          | 297 ± 129   | 287 ± 101          | 347 ± 149   |
| V <sub>O</sub> /V <sub>T</sub> | R  | 0.61 ± 0.04 | 0.60 ± 0.04  | 0.60 ± 0.05 | 0.57 ± 0.04      | 0.57 ± 0.04   | 0.58 ± 0.03       | 0.56 ± 0.03 | 0.59 ± 0.05        | 0.59 ± 0.05 |
|                                | NR | 0.66 ± 0.03 | 0.66 ± 0.03  | 0.67 ± 0.04 | 0.66 ± 0.03      | 0.67 ± 0.04   | 0.67 ± 0.04       | 0.67 ± 0.04 | 0.66 ± 0.01        | 0.66 ± 0.01 |

Data are mean ± SEM.

\* Significantly different from baseline values ( $P < 0.05$ ).



## PHENYLEPHRINE AND NITRIC OXIDE IN PATIENTS WITH ARDS

regarding the presence of vascular fibrosis. A third phenomenon also may play a role: phenylephrine-nonresponders required significantly more phenylephrine to reach mABP endpoints, suggesting that intrinsic systemic responsiveness to phenylephrine also affects whether phenylephrine will increase  $\text{Pa}_{\text{O}_2}$  in patients with ARDS.

In conclusion, we found that phenylephrine and NO can increase  $\text{Pa}_{\text{O}_2}$  in patients with ARDS and that phenylephrine alone increases  $\text{Pa}_{\text{O}_2}$  and mPAP in some of these patients (phenylephrine-responders). This suggests that phenylephrine-induced vasoconstriction effectively increases HPV. In phenylephrine-responders, the increase in  $\text{Pa}_{\text{O}_2}$  with phenylephrine + NO was greater than that with either treatment alone, as would be expected from separate, complementary mechanisms of action.

## References

1. Murray JF, Matthay MA, Luce JM, Flick MR: An expanded definition of the adult respiratory distress syndrome. *Am Rev Respir Dis* 1988; 138:720-3
2. Zapol WM, Jones R: Vascular components of ARDS: clinical pulmonary hemodynamics and morphology. *Am Rev Respir Dis* 1987; 136:471-4
3. Leeman M: The pulmonary circulation in acute lung injury: A review of some recent advances. *Intensive Care Med* 1991; 17:254-60
4. Marini JJ: New approaches to the ventilatory management of the adult respiratory distress syndrome. *J Crit Care* 1995; 7:256-67
5. Rossaint R, Falke KJ, López FA, Slama K, Pison U, Zapol WM: Inhaled nitric oxide for the adult respiratory distress syndrome. *N Engl J Med* 1993; 328:399-405
6. Bigatello LM, Hurford W, Kacmarek RM, Roberts JD, Zapol WM: Prolonged inhalation of low concentrations of nitric oxide in patients with severe adult respiratory distress syndrome. *ANESTHESIOLOGY* 1994; 80:761-70
7. Puybasset L, Rouby JJ, Mourgeon E, Stewart TE, Cluzel P, Arthaud M, Poete P, Bodin L, Korinek AM, Viars P: Inhaled nitric oxide in acute respiratory failure: Dose-response curves. *Intensive Care Med* 1994; 20:319-27
8. Puybasset L, Rouby JJ, Mourgeon E, Cluzel P, Souhil Z, Law-Koune JD, Stewart T, Devilliers C, Lu Q, Roche S, Kalfon P, Vicaut E, Viars P: Factors influencing cardiopulmonary effects of inhaled nitric oxide in acute respiratory failure. *Am J Respir Crit Care Med* 1995; 152:318-28
9. Rossaint R, Gerlach H, Schmidt-Ruhnke H, Pappert D, Lewandowski K, Steudel W, Falke KJ: Efficacy of inhaled nitric oxide in patients with severe ARDS. *Chest* 1995; 107:1107-15
10. Rossaint R, Slama K, Steudel W, Gerlach H, Pappert D, Veit S, Falke KJ: Effects of inhaled nitric oxide on right ventricular function in severe acute respiratory distress syndrome. *Intensive Care Med* 1995; 21:197-203
11. Reyes A, Roca J, Rodriguez-Roisin R, Torres A, Ussetti P, Wagner PD: Effect of almitrine on ventilation-perfusion distribution in adult respiratory distress syndrome. *Am Rev Respir Dis* 1988; 137:1062-7
12. Prost J, Desché P, Jardin F, Margairaz A: Comparison of the effects of intravenous almitrine and positive end-expiratory pressure on pulmonary gas exchange in adult respiratory distress syndrome. *Eur Respir J* 1991; 4:683-7
13. Payen DM, Gatecel C, Plaisance P: Almitrine effect on nitric oxide inhalation in adult respiratory distress syndrome. *Lancet* 1993; 341:1664
14. Wysocki M, Roupie E, Langeron O, Liu N, Herman B, Lemaire F, Brochard L: Additive effect on gas exchange of inhaled nitric oxide and intravenous almitrine bismesylate in the adult respiratory distress syndrome. *Intensive Care Med* 1994; 20:254-9
15. Lu Q, Law-Koune JD, Vezinet C, Mourgeon E, Abdennour L, Puybasset L, Bodin L, Rouby JJ, Viars P: Increasing concentrations of inhaled NO in combination with almitrine in patients with ARDS (Abstract). *Br J Anaesth* 1995; 74:A411
16. Lu Q, Mourgeon E, Law-Koune JD, Roche S, Vezinet C, Abdennour L, Vicaut E, Puybasset L, Diaby M, Coriat P, Rouby JJ: Dose-response curves of inhaled nitric oxide with and without intravenous almitrine in nitric oxide-responding patients with acute respiratory distress syndrome. *ANESTHESIOLOGY* 1995; 83:929-43
17. Marshall BE, Hanson CW, Frasch HF, Marshall C: Role of hypoxic pulmonary vasoconstriction in pulmonary gas exchange and blood flow distribution: II. Pathophysiology. *Intensive Care Med* 1994; 20:379-89
18. Marshall BE, Chen L, Frasch HF, Lilagen P, Hanson CW, Marshall C: Pulmonary vasoconstriction enhances the response to nitric oxide in atelectasis (Abstract). *ANESTHESIOLOGY* 1995; 83:A1196
19. Dawson CA: Role of pulmonary vasomotion in physiology of the lung. *Physiol Rev* 1984; 64:544-616
20. Mira JP, Monchi M, Brunet F, Fierobe L, Dhainaut JF, Dinh-Xuan AT: Lack of efficacy of inhaled nitric oxide in ARDS. *Intensive Care Med* 1994; 20:532
21. Lowson SM, McArdle P, Rich GF: Variable responses to inhaled nitric oxide in patients with ARDS (Abstract). *ANESTHESIOLOGY* 1994; 81:A124
22. Steltzer H, Fridrich P, Koc D, Hiesmayr M, Krafft P, Hammerle AF: Prolonged inhalation of nitric oxide in patients with septic acute respiratory distress syndrome: Effects on haemodynamics and oxygenation in responders and non-responders (Abstract). *Br J Anaesth* 1995; 74:A410
23. Cone J, Robertson R, Kellar J, Bond P: Failure of nitric oxide therapy (Abstract). *Crit Care Med* 1996; 24:213
24. Dellinger RP, Zimmerman JL, Hyers TM, Taylor RW, Straube RC, Hauser DL, Damask MC, Davis K, Criner GJ: Nitric oxide in ARDS: Preliminary results of a multicenter clinical trial (Abstract). *Crit Care Med* 1996; 24:7
25. Lowson SM, Rich GF, McArdle P, Jaidev J, Morris G: The response to varying concentrations of inhaled nitric oxide in patients with acute respiratory distress syndrome. *Anesth Analg* 1996; 82:574-81
26. Hess D, Kacmarek RM, Ritz R, Bigatello LM, Hurford WE: Inhaled nitric oxide delivery systems: A role for respiratory therapists. *Resp Care* 1995; 40:702-5
27. Tibballs J: The role of nitric oxide (formerly endothelium-derived relaxing factor—EDRF) in vasodilatation and vasodilator therapy. 1993; 21:759-73
28. Smith TC: Rapid continuous measurement of mixed expired carbon dioxide concentration. *ANESTHESIOLOGY* 1968; 29:1037-9
29. Winer BJ, Brown DR, Michels KM: Statistical Principles in Experimental Design. New York, McGraw-Hill; 1991, pp 115-20
